# Supplementary material for: Chrna2-Martinotti Cells Synchronize Layer 5 Type A Pyramidal Cells via Rebound Excitation
Source: PLoS Biol. 2017 Feb 9;15(2):e2001392. doi: 10.1371/journal.pbio.2001392 (PMC5300109; doi:10.1371/journal.pbio.2001392)
Supplement: S5 Data — (XLSX) [file pbio.2001392.s013.xlsx]

## Sheet: Data S4B Fig
		5 ms	10 ms	100 ms	250 ms	500 ms	1000 ms				5 ms	10 ms	100 ms	250 ms	500 ms	1000 ms				5 ms	10 ms	100 ms	250 ms	500 ms	1000 ms				500 ms	1000 ms				500 ms	1000 ms
	Amplitude (mV)									Time to Peak (ms)									Rebound APs (#)									Max frequency (Hz)					Rebound Duration (ms)
	Cell #									Cell #									Cell #									Cell #					Cell #
	1	17.9935	19.9061	25.5723	25.2832	25.7466	27.7925			1	5.05	9.5	99.1	125.8	128.65	139.65			1	0	0	1	1	1	2			1	NaN	5.04159			1	300	531.9
	2	17.9782	20.2274	25.0368	24.8548	25.7772	27.4559			2	5.15	9.45	98.6	135.8	170.95	123.55			2	0	0	1	1	3	3			2	10.7239	18.7617			2	300	690.95
	3	18.0853	20.0591	25.4805	25.5893	26.328	26.8592			3	4.4	8.9	98.3	120.9	134.95	124.9			3	0	0	0	1	2	2			3	5.98546	4.5571			3	482.3	679.95
	4	18.2995	20.4263	25.756	26.3849	25.9149	26.6144			4	4.55	8.95	97.2	119.35	140.6	128.65			4	0	0	0	1	2	4			4	7.5959	18.0948			4	431.65	500
	5	17.7345	20.2427	26.1844	25.5587	26.4811	25.9717			5	4.15	9.2	97.2	123.4	130.55	133.25			5	0	0	1	1	3	2			5	11.5694	4.96459			5	404.5	611.55
	6	18.3137	19.5083	25.7866	26.4002	25.9608	26.0941			6	4.45	9.25	98.8	130.3	113.65	137.5			6	0	0	1	1	2	5			6	9.77303	4.94852			6	428.65	500
	7	18.1312	20.3345	26.0467	25.9871	26.6341	26.4767			7	4.65	9.8	98.65	119.95	113.85	135.85			7	0	0	0	1	2	3			7	11.1617	18.0983			7	409.15	500
	8	17.8864	19.9673	26.8576	26.5073	25.7466	26.1706			8	5.1	9.3	98.65	136.85	115.05	121.9			8	0	0	1	1	3	3			8	11.0893	18.348			8	300	610.6
	9	17.9017	20.0744	27.0565	26.6297	26.0373	27.3641			9	4.45	9.55	98.8	120.6	114	150.3			9	0	0	1	1	3	4			9	11.0284	18.0384			9	300	500
	10	18.0853	20.5028	25.6947	26.0483	27.0472	26.3236			10	4.75	9.55	98.3	116.8	135.8	130.4			10	0	0	1	1	3	5			10	9.95883	4.99284			10	300	500
	11	17.8099	20.1815	26.1844	26.7827	26.1903	26.7062			11	3.9	9.25	98.7	129.45	119.65	129.5			11	0	0	0	1	3	4			11	15.9261	17.5385			11	383.85	500
	12	18.0853	20.4875	26.5822	26.6756	26.2362	26.0788			12	5.25	9.2	97.2	124.8	138.65	135.05			12	0	0	1	1	2	1			12	11.5361	NaN			12	417.15	500
	mean	18.0254	20.1599	26.0199	26.0585	26.175	26.659			mean	4.65417	9.325	98.2917	125.333	129.696	132.542												mean	10.5771	12.1259			mean	371.438	552.079
	SEM	0.051433	0.0817374	0.170446	0.177982	0.11515	0.173503			SEM	0.121459	0.074747	0.1997	1.88233	4.79742	2.2858												SEM	0.75284	2.08774			SEM	19.3581	21.6708
